# Supplementary material
Source: publisher site journal article supplement (https://www.dovepress.com/article/230795)
Supplement: Supplementary file 1 [file get_supplementary_file.php]

**Table S1 The sequences for primers and siRNAs**

| Primer name | Sequence |
| --- | --- |
| circGFRA1-F | CCTCCGGGTTAAGAACAAGC |
| circGFRA1-R | CTGGCTGGCAGTTGGTAAAA |
| miR-188-3p-F | CUCCCACATGCAGGG |
| miR-188-3p-R | GTGCAGGGTCCGAGGT |
| miR-188-3p -RT | GTCGTATCCAGTGCAGGGTCCGAGGTATTCGCACTGGATACGACATGCAAA |
| GAPDH-F | ATGGGGAAGGTGAAGGTCG |
| GAPDH-R | GGGGTCATTGATGGCAACAATA |
| U6-F | CTCGCTTCGGCACA |
| U6-R | AACGCTTCACGAATTTGCGT |
| si-GFRA1 | GCAAATTTACAGATCTCGCCT |
| miR-188-3p mimic | CUCCCACAUGCAGGGUUUGCA |
| anti- miR-188-3p | UGCAAACCGACUUGUGGGAG |
| NC | UUCUCCGAACGUGUCACGUUU |


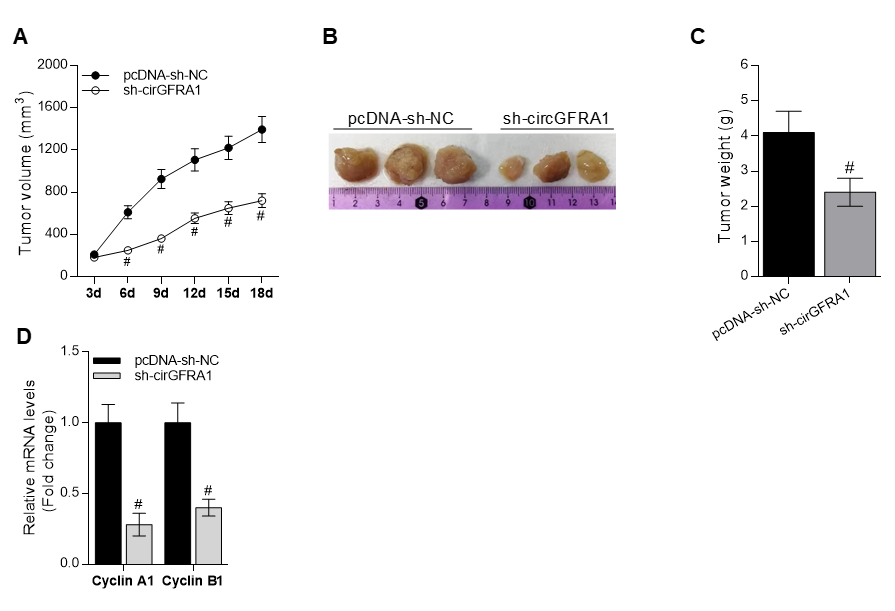
**Supplementary Figure 1**

**Supplementary figure 1. CircGFRA1 regulate the proliferation of NSCLC tumors in vivo.** The NCI-H838 cells were transfected with pcDNA-sh-NC, sh-circGFRA1 for 72 h, then the cells were inoculated subcutaneously into nude mice. (A) Tumor volume was markedly decreased in sh-circGFRA1 group when compared to pcDNA-sh-NC. #P < 0.05 compared with pcDNA-sh-NC. (B) Representative images of resected tumor masses in pcDNA-sh-NC, sh-circGFRA1 group. (C) Tumor weight was markedly decreased in sh-circGFRA1 group when compared to pcDNA-sh-NC. #P < 0.05 compared with pcDNA-sh-NC. (D) The expression of proliferation-related genes including Cyclin A1, Cyclin B1 was detected by RT-qPCR,#P < 0.05 compared with pcDNA-sh-NC.

**Supplementary Figure** **2**

**Supplementary figure 2. The phosphorylation level of AKT was detected by Western Blot.** The phosphorylation level of AKT was detected in NCI-H838 cells after circGFRA1 and LY26402 was given individually or jointly.
